# Supplementary material
Source: PubMed Central journal article supplement (PMC4806771)
Supplement: supp_dc15-2284v152284_DC152284SupplementaryData.pdf [file supp_dc15-2284v152284_DC152284SupplementaryData.pdf]

SUPPLEMENTARY DATA

**Supplementary Table 1.** Baseline characteristics of non-diabetic participants in the IRAS by ethnicity

|                                                                                | Caucasians       | African Americans | Hispanics        | p-value |
|--------------------------------------------------------------------------------|------------------|-------------------|------------------|---------|
| BCAA ( $\mu\text{Mols/L}$ )                                                    | 332 $\pm$ 62.8   | 320 $\pm$ 61.6    | 327 $\pm$ 60.2   | 0.15    |
| Valine ( $\mu\text{Mols/L}$ )                                                  | 178 $\pm$ 35.6   | 171 $\pm$ 33.5    | 176 $\pm$ 33.7   | 0.10    |
| Leucine ( $\mu\text{Mols/L}$ )                                                 | 113 $\pm$ 21.3   | 109 $\pm$ 22.2    | 110 $\pm$ 21.9   | 0.22    |
| Isoleucine ( $\mu\text{Mols/L}$ )                                              | 41.2 $\pm$ 9.21  | 40.3 $\pm$ 10.2   | 40.3 $\pm$ 9.0   | 0.42    |
| Insulin sensitivity ( $\times 10^{-4} \text{ min}^{-1} [\mu\text{U/l}]^{-1}$ ) | 1.9 (1.12–3.37)  | 1.42 (0.85–2.44)  | 1.37 (0.69–2.64) | <0.0001 |
| Fasting insulin (pmol/l)                                                       | 11 (8–16)        | 13 (9.5–19)       | 15 (10–21)       | <0.0001 |
| Acute insulin response ( $\mu\text{U/ml}$ )                                    | 42 (23.5–69)     | 63.3 (31.5–94.3)  | 59.5 (38–99.5)   | <0.0001 |
| Metabolic clearance of insulin (l/min)                                         | 5.77 (4.39–7.57) | 4.80 (3.79–6.21)  | 4.86 (3.60–6.56) | <0.0001 |

Data in means  $\pm$  standard deviations or percentages or medians (interquartile ranges)

**Supplementary Table 2.** Baseline characteristics of non-diabetic participants in the IRAS by distribution of  $S_1$

|                                     | Distribution of $S_1$ |                  |                  | p-value |
|-------------------------------------|-----------------------|------------------|------------------|---------|
|                                     | Lowest third          | Middle third     | Upper third      |         |
| BCAA ( $\mu\text{Mols/L}$ )         | 345 $\pm$ 61.8        | 329 $\pm$ 58.2   | 308 $\pm$ 59.6   | <0.0001 |
| Age (years)                         | 55.3 $\pm$ 8.47       | 55.0 $\pm$ 8.29  | 54.1 $\pm$ 8.56  | 0.14    |
| Male (%)                            | 48.1                  | 41.9             | 44.1             | 0.26    |
| Ethnicity (%)                       |                       |                  |                  |         |
| Caucasians                          | 30.0                  | 41.0             | 49.3             | <0.001  |
| African Americans                   | 29.4                  | 28.3             | 20.1             |         |
| Hispanics                           | 40.7                  | 30.7             | 30.6             |         |
| Current smoker (%)                  | 15.4                  | 14.8             | 18.3             | 0.73    |
| Current drinker (%)                 | 75.5                  | 71.1             | 76.3             | 0.50    |
| Energy expenditure (kcal/kg/d)      | 37.7 (35.1–42.2)      | 38.4 (35.5–43.3) | 39.1 (36.1–44.6) | 0.0036  |
| Family history of diabetes (%)      | 44.5                  | 42.5             | 30.6             | <0.001  |
| Impaired glucose tolerance (%)      | 53.1                  | 34.6             | 11.4             | <0.001  |
| Body mass index ( $\text{kg/m}^2$ ) | 31.9 $\pm$ 6.35       | 28.1 $\pm$ 4.33  | 25.3 $\pm$ 3.81  | <0.0001 |
| Waist-hip ratio                     | 0.90 $\pm$ 0.076      | 0.86 $\pm$ 0.084 | 0.83 $\pm$ 0.084 | <0.0001 |
| Energy intake (kcal/day)            | 1966 $\pm$ 877        | 1848 $\pm$ 818   | 1849 $\pm$ 718   | 0.099   |
| Protein intake (g/day)              | 79.4 $\pm$ 36.8       | 77.2 $\pm$ 35.7  | 76.3 $\pm$ 29.8  | 0.49    |
| Incident diabetes (%)               | 26.7                  | 16.0             | 4.6              | <0.001  |

Data in means  $\pm$  standard deviations or percentages or medians (interquartile ranges)

SUPPLEMENTARY DATA

**Supplementary Table 3.** Spearman correlation analysis among plasma BCAAs

|            | Total BCAA |         | Valine |         | Leucine |         |
|------------|------------|---------|--------|---------|---------|---------|
|            | rho        | p-value | rho    | p-value | rho     | p-value |
| Valine     | 0.95       | <0.0001 |        |         |         |         |
| Leucine    | 0.92       | <0.0001 | 0.76   | <0.0001 |         |         |
| Isoleucine | 0.90       | <0.0001 | 0.77   | <0.0001 | 0.89    | <0.0001 |

Data shown is rho (r)

**Supplementary Table 4.** Spearman correlation analysis between plasma BCAAs with measures of insulin metabolism

|                        | Fasting insulin | S <sub>I</sub> | MCRI    | AIR    | FBG    | 2h pc BG |
|------------------------|-----------------|----------------|---------|--------|--------|----------|
| All participants       | 0.26**          | -0.26**        | -0.30** | 0.068  | 0.23*  | 0.13**   |
| Caucasians             | 0.31**          | -0.35**        | -0.36** | 0.12*  | 0.23*  | 0.24**   |
| African Americans      | 0.18*           | -0.12          | -0.24*  | 0.016  | 0.16*  | -0.063   |
| Hispanics              | 0.32**          | -0.29**        | -0.34** | 0.095  | 0.30** | 0.15*    |
| Caucasians + Hispanics | 0.29**          | -0.31**        | -0.33** | 0.091* | 0.27** | 0.20**   |

Data shown is rho (r), \*\*p<0.0001, \*p<0.05

**Supplementary Table 5.** Spearman correlation analysis of individual BCAAs with measures of insulin sensitivity, secretion and clearance

|                 | Valine |         | Leucine |         | Isoleucine |         |
|-----------------|--------|---------|---------|---------|------------|---------|
|                 | rho    | p-value | rho     | p-value | rho        | p-value |
| Fasting insulin | 0.26   | <0.0001 | 0.23    | <0.0001 | 0.23       | <0.0001 |
| S <sub>I</sub>  | -0.26  | <0.0001 | -0.22   | <0.0001 | -0.23      | <0.0001 |
| MCRI            | -0.30  | <0.0001 | -0.26   | <0.0001 | -0.27      | <0.0001 |
| AIR             | 0.095  | 0.013   | 0.019   | 0.6     | 0.034      | 0.4     |

**Supplementary Table 6.** Estimated regression coefficients (95% confidence intervals) on the association between plasma BCAAs and S<sub>I</sub>, stratified by ethnicity

|                   | Beta-coefficients (95% CI)  | p-value |
|-------------------|-----------------------------|---------|
| <b>Caucasians</b> |                             |         |
| Unadjusted        | -0.0031 (-0.0040, -0.0022)  | <0.001  |
| Model 1           | -0.0034 (-0.0044, -0.0024)  | <0.001  |
| Model 2           | -0.0028 (-0.0038, -0.0018)  | <0.001  |
| Model 3           | -0.0017 (-0.0026, -0.00074) | <0.001  |
| <b>Hispanics</b>  |                             |         |
| Unadjusted        | -0.0024 (-0.0035, -0.0012)  | <0.001  |
| Model 1           | -0.0025 (-0.0037, -0.0012)  | <0.001  |
| Model 2           | -0.0018 (-0.0030, -0.00059) | 0.004   |
| Model 3           | -0.0012 (-0.0023, 0.00014)  | 0.053   |

Model 1 – adjusted for age, sex, ethnicity, study center

Model 2 – Model 1 + smoking, alcohol consumption, caloric expenditure, family history of diabetes, dietary kcal, dietary protein, fasting blood glucose

Model 3 – Model 2 + BMI

SUPPLEMENTARY DATA

**Supplementary Table 7.** Estimated odds ratios (95% confidence intervals) on the association between plasma BCAAs distribution and incident diabetes

|                               | Odds ratios (95% CI)<br>per 1 SD increase in BCAAs | p-value |
|-------------------------------|----------------------------------------------------|---------|
| <b>All participants</b>       |                                                    |         |
| Model 1                       | 1.49 (1.19, 1.87)                                  | 0.001   |
| Model 2                       | 1.30 (1.00, 1.69)                                  | 0.050   |
| Model 3                       | 1.23 (0.94, 1.60)                                  | 0.131   |
| Model 4                       | 1.26 (0.96, 1.65)                                  | 0.094   |
| <b>Caucasians</b>             |                                                    |         |
| Model 1                       | 2.15 (1.46, 3.15)                                  | <0.001  |
| Model 2                       | 1.96 (1.26, 3.05)                                  | 0.003   |
| Model 3                       | 1.66 (1.06, 2.59)                                  | 0.027   |
| Model 4                       | 1.64 (1.05, 2.58)                                  | 0.031   |
| <b>African Americans</b>      |                                                    |         |
| Model 1                       | 0.84 (0.52, 1.35)                                  | 0.462   |
| Model 2                       | 0.69 (0.36, 1.32)                                  | 0.258   |
| Model 3                       | 0.71 (0.37, 1.37)                                  | 0.314   |
| Model 4                       | 0.72 (0.37, 1.41)                                  | 0.343   |
| <b>Hispanics</b>              |                                                    |         |
| Model 1                       | 1.62 (1.07, 2.46)                                  | 0.024   |
| Model 2                       | 1.41 (0.86, 2.33)                                  | 0.174   |
| Model 3                       | 1.34 (0.82, 2.22)                                  | 0.261   |
| Model 4                       | 1.50 (0.89, 2.53)                                  | 0.132   |
| <b>Caucasians + Hispanics</b> |                                                    |         |
| Model 1                       | 1.85 (1.41, 2.44)                                  | <0.001  |
| Model 2                       | 1.67 (1.21, 2.29)                                  | 0.002   |
| Model 3                       | 1.52 (1.10, 2.10)                                  | 0.011   |
| Model 4                       | 1.57 (1.13, 2.17)                                  | 0.007   |

Model 1 – adjusted for age, sex, ethnicity, study center

Model 2 – Model 1 + smoking, alcohol consumption, caloric expenditure, family history of diabetes, dietary kcal, dietary protein, fasting blood glucose, BMI (fully-adjusted model)

Model 3 – Model 2 + S<sub>1</sub>

Model 4 – Model 3 + MCRI

SUPPLEMENTARY DATA

**Supplementary Figure 1.** Quintile distribution of SI by ethnic groups

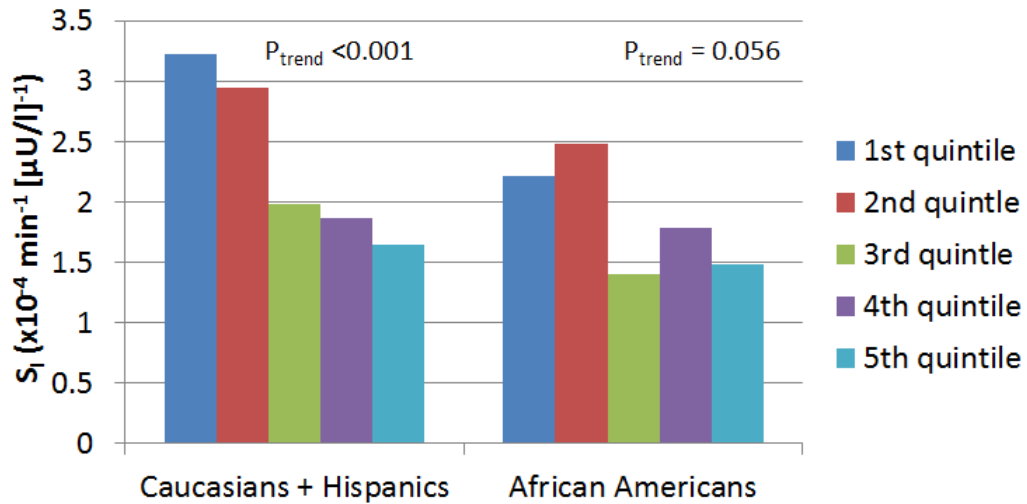

**Supplementary Figure 2.** Quintile distribution of MCRI by ethnic groups

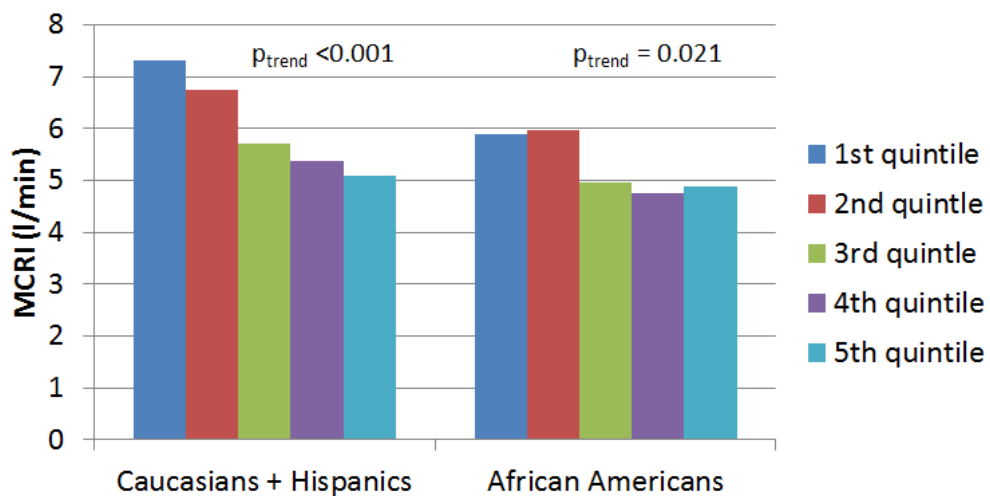

SUPPLEMENTARY DATA

**Supplementary Figure 3.** Area under the receive operator characteristic curve for metabolic syndrome with or without BCAA

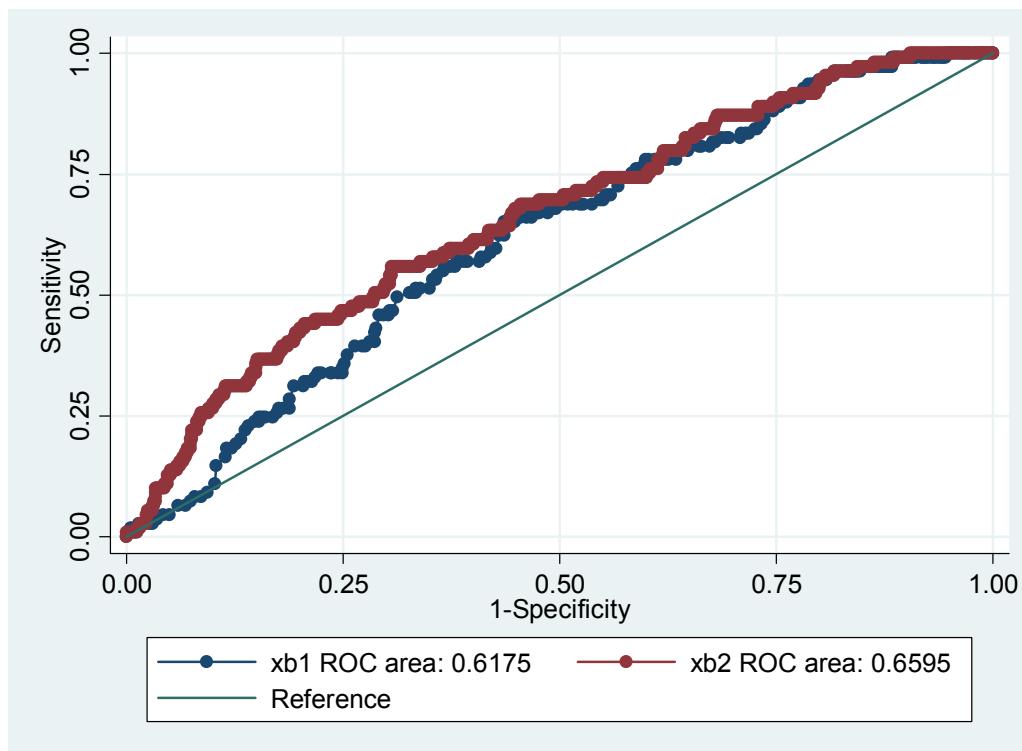

Xb1: age, sex, ethnicity, metabolic syndrome  
Xb2: age, sex, ethnicity, metabolic syndrome, BCAA  
p=0.10 comparing xb1 vs. xb2

SUPPLEMENTARY DATA

**Supplementary Figure 4.** Area under the receive operator characteristic curve for BMI with or without BCAA

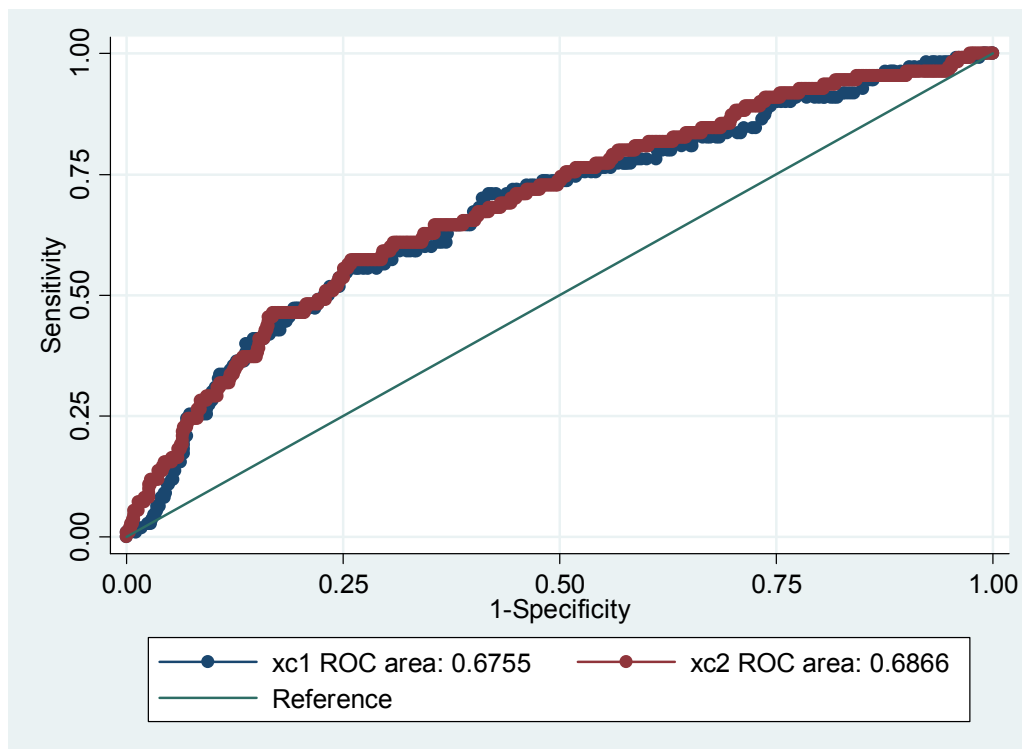

Xc1: age, sex, ethnicity, BMI  
Xc2: age, sex, ethnicity, BMI, BCAA  
p=0.34 comparing xc1 vs. xc2

SUPPLEMENTARY DATA

**Supplementary Figure 5.** Area under the receive operator characteristic curve for IFG with or without BCAA

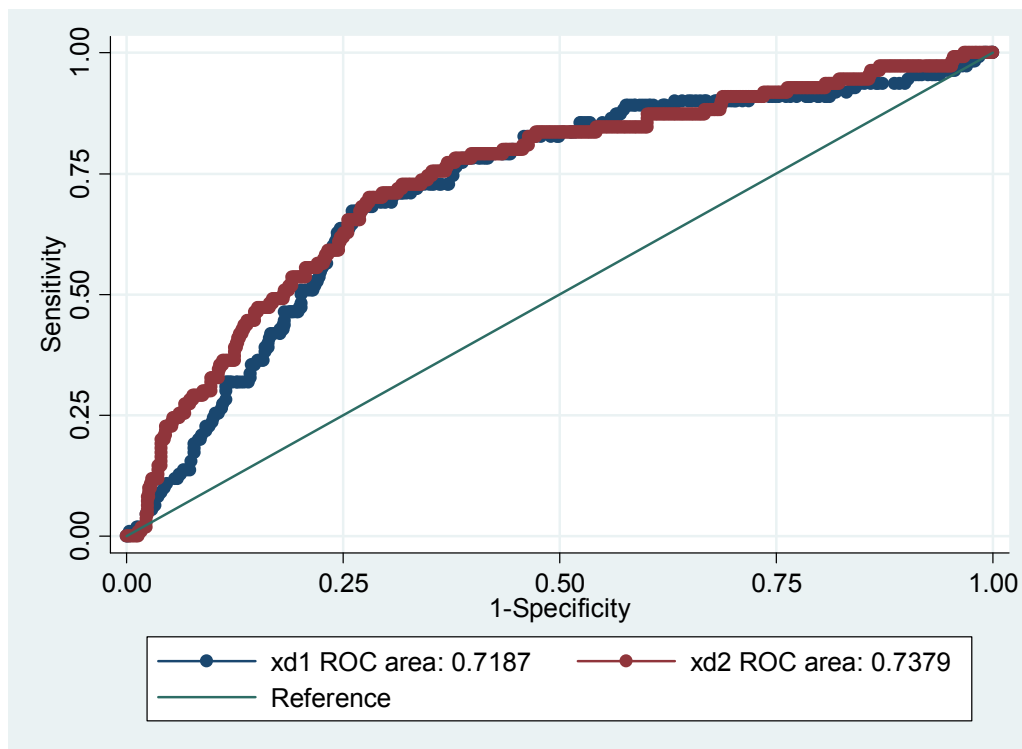

Xd1: age, sex, ethnicity, IFG  
Xd2: age, sex, ethnicity, IFG, BCAA  
p=0.25 comparing xd1 vs. xd2
